# Supplementary material for: Trends in Calcium Intake among the US Population: Results from the NHANES (1999–2018)
Source: MDPI journal article supplement (doi:10.3390/nu16050726), 2024-03-02
Supplement: s1 [file s1]

**Table S1A** Dietary calcium intake distribution (weighted) across DRIs among the US population, from 1999-2000 to 2017-2018

|                          | Weighted Proportion of Population, % (95% CI) |                 |                 |                 |                 |                 |                 |                 |                 |                 |
|--------------------------|-----------------------------------------------|-----------------|-----------------|-----------------|-----------------|-----------------|-----------------|-----------------|-----------------|-----------------|
|                          | 1999-2000                                     | 2001-2002       | 2003-2004       | 2005-2006       | 2007-2008       | 2009-2010       | 2011-2012       | 2013-2014       | 2015-2016       | 2017-2018       |
| <b>Men</b>               |                                               |                 |                 |                 |                 |                 |                 |                 |                 |                 |
| <EAR                     | 51.2(48.0,54.5)                               | 47.2(44.4,50.0) | 47.0(44.1,49.9) | 42.8(39.7,45.8) | 43.2(39.8,46.6) | 38.9(37.2,40.7) | 38.5(35.2,41.8) | 41.8(39.4,44.2) | 42.2(38.6,45.8) | 40.2(37.7,42.7) |
| ≥EAR, <RDA               | 12.9(11.4,14.5)                               | 13.3(11.3,15.4) | 14.5(12.8,16.3) | 14.7(12.2,17.2) | 15.8(15.0,16.7) | 13.3(11.8,14.8) | 14.2(11.9,16.5) | 12.9(11.3,14.5) | 14.3(12.4,16.2) | 15.2(13.3,17.1) |
| ≥RDA, ≤UL                | 33.9(31.2,36.7)                               | 35.8(33.9,37.7) | 35.0(32.8,37.2) | 39.0(36.7,41.4) | 37.6(34.5,40.6) | 42.2(40.0,44.4) | 42.8(40.3,45.3) | 41.1(39.0,43.1) | 39.7(35.9,43.4) | 40.4(37.5,43.4) |
| >UL                      | 1.90(1.24,2.55)                               | 3.68(2.63,4.74) | 3.47(2.57,4.37) | 3.49(2.47,4.51) | 3.43(2.24,4.63) | 5.62(4.02,7.22) | 4.46(3.22,5.70) | 4.29(3.09,5.49) | 3.83(2.51,5.16) | 4.18(3.05,5.31) |
| <b>Women</b>             |                                               |                 |                 |                 |                 |                 |                 |                 |                 |                 |
| <EAR                     | 68.5(64.2,72.8)                               | 65.7(63.8,67.6) | 65.3(62.8,67.8) | 61.9(57.5,66.3) | 60.7(55.9,65.6) | 56.8(54.9,58.8) | 57.0(54.1,59.9) | 59.9(57.5,62.2) | 60.0(55.6,64.3) | 58.9(55.6,62.2) |
| ≥EAR, <RDA               | 10.8(8.04,13.5)                               | 11.0(8.89,13.1) | 11.0(10.0,11.9) | 12.1(10.7,13.5) | 13.4(11.0,15.7) | 14.0(12.4,15.5) | 13.8(12.1,15.5) | 13.2(11.4,15.0) | 14.1(12.3,15.9) | 15.5(13.1,17.9) |
| ≥RDA, ≤UL                | 19.9(17.3,22.5)                               | 22.4(19.9,24.8) | 22.7(19.7,25.6) | 24.7(21.2,28.2) | 24.8(21.6,28.0) | 27.8(26.2,29.3) | 28.2(25.5,31.0) | 25.7(23.2,28.2) | 24.9(21.5,28.3) | 24.6(21.7,27.6) |
| >UL                      | 0.81(0.39,1.23)                               | 0.90(0.54,1.25) | 1.08(0.45,1.72) | 1.31(0.81,1.81) | 1.08(0.45,1.71) | 1.44(1.03,1.86) | 0.97(0.30,1.63) | 1.29(0.65,1.92) | 1.06(0.50,1.61) | 0.99(0.45,1.52) |
| <b>2-8 years old</b>     |                                               |                 |                 |                 |                 |                 |                 |                 |                 |                 |
| <EAR                     | 44.5(38.7,50.2)                               | 35.0(30.2,39.9) | 29.7(24.7,34.8) | 35.0(31.9,38.2) | 36.1(33.0,39.2) | 29.9(27.0,32.7) | 28.3(23.9,32.7) | 34.5(30.8,38.2) | 35.9(31.6,40.2) | 33.6(29.1,38.0) |
| ≥EAR, <RDA               | 18.8(15.2,22.5)                               | 16.2(13.1,19.3) | 19.0(14.5,23.6) | 17.8(13.9,21.6) | 18.2(14.8,21.5) | 18.9(16.7,21.0) | 18.1(15.4,20.8) | 14.4(11.7,17.2) | 19.1(15.9,22.3) | 18.0(14.5,21.4) |
| ≥RDA, ≤UL                | 36.5(30.6,42.4)                               | 47.8(42.4,53.3) | 50.2(43.8,56.5) | 46.6(41.7,51.5) | 45.3(41.6,49.1) | 50.2(46.9,53.5) | 52.6(48.1,57.1) | 49.7(44.8,54.6) | 44.3(40.6,48.1) | 48.0(43.2,52.7) |
| >UL                      | 0.22(0.00,0.57)                               | 0.91(0.38,1.43) | 1.05(0.27,1.83) | 0.64(0.00,1.39) | 0.42(0.04,0.80) | 1.10(0.46,1.74) | 1.02(0.13,1.91) | 1.41(0.32,2.49) | 0.69(0.00,1.48) | 0.49(0.01,0.98) |
| <b>9-18 years old</b>    |                                               |                 |                 |                 |                 |                 |                 |                 |                 |                 |
| <EAR                     | 71.3(67.5,75.0)                               | 66.0(61.1,70.9) | 63.2(56.8,69.6) | 64.9(59.7,70.1) | 64.8(60.2,69.4) | 59.6(54.8,64.3) | 57.8(53.7,61.9) | 62.3(58.0,66.6) | 65.0(60.0,70.0) | 64.5(58.9,70.2) |
| ≥EAR, <RDA               | 7.72(5.96,9.47)                               | 10.5(8.92,12.1) | 9.81(7.17,12.5) | 11.5(9.13,13.9) | 12.0(9.29,14.7) | 9.32(6.92,11.7) | 10.8(7.50,14.0) | 10.3(7.33,13.4) | 10.1(7.39,12.9) | 11.4(8.34,14.4) |
| ≥RDA, ≤UL                | 20.4(17.5,23.3)                               | 22.1(18.5,25.7) | 25.9(19.8,32.1) | 22.5(18.2,26.7) | 22.1(19.1,25.1) | 29.4(25.7,33.1) | 31.0(26.7,35.2) | 26.0(22.5,29.4) | 23.7(19.5,27.9) | 23.6(19.8,27.5) |
| >UL                      | 0.66(0.13,1.20)                               | 1.44(0.34,2.53) | 1.03(0.28,1.79) | 1.09(0.15,2.04) | 1.10(0.53,1.67) | 1.73(1.22,2.24) | 0.46(0.00,1.02) | 1.37(0.09,2.65) | 1.11(0.41,1.81) | 0.44(0.00,0.89) |
| <b>19-59 years old</b>   |                                               |                 |                 |                 |                 |                 |                 |                 |                 |                 |
| <EAR                     | 56.2(51.3,61.0)                               | 52.9(49.9,55.9) | 53.7(50.4,56.9) | 47.6(43.2,52.0) | 47.1(42.4,51.8) | 42.9(41.6,44.2) | 43.7(40.6,46.7) | 46.3(43.8,48.9) | 44.9(40.6,49.1) | 43.5(41.2,45.9) |
| ≥EAR, <RDA               | 12.4(10.0,14.7)                               | 12.9(11.1,14.8) | 13.2(11.6,14.7) | 13.5(12.1,15.0) | 15.1(13.0,17.2) | 15.0(14.0,15.9) | 14.8(12.5,17.1) | 14.3(12.3,16.3) | 15.5(13.9,17.1) | 16.7(14.6,18.8) |
| ≥RDA, ≤UL                | 29.7(26.3,33.0)                               | 31.6(28.5,34.6) | 30.2(26.8,33.7) | 35.9(32.5,39.3) | 34.8(30.9,38.8) | 38.2(36.6,39.7) | 38.5(35.9,41.0) | 36.1(33.4,38.8) | 36.9(32.9,40.9) | 36.6(33.9,39.4) |
| >UL                      | 1.78(1.03,2.52)                               | 2.63(1.69,3.57) | 2.92(2.16,3.68) | 3.02(1.98,4.05) | 2.92(2.01,3.83) | 3.95(2.70,5.21) | 3.09(2.22,3.95) | 3.23(2.21,4.26) | 2.75(1.74,3.76) | 3.12(1.84,4.40) |
| <b>60 years or older</b> |                                               |                 |                 |                 |                 |                 |                 |                 |                 |                 |
| <EAR                     | 74.3(71.4,77.3)                               | 75.7(72.3,79.1) | 73.2(69.6,76.8) | 67.9(63.1,72.7) | 68.9(64.4,73.3) | 65.1(62.5,67.7) | 63.6(59.2,68.0) | 63.6(60.3,66.9) | 66.1(60.8,71.4) | 63.0(57.3,68.6) |
| ≥EAR, <RDA               | 8.96(6.62,11.3)                               | 8.15(6.18,10.1) | 10.3(7.95,12.6) | 11.9(9.44,14.3) | 12.6(10.3,14.8) | 10.0(8.28,11.8) | 11.8(9.93,13.7) | 10.7(8.50,12.9) | 11.2(8.57,13.9) | 13.3(10.2,16.4) |
| ≥RDA, ≤UL                | 15.5(13.9,17.1)                               | 13.6(10.8,16.4) | 14.8(12.1,17.4) | 17.9(15.0,20.8) | 16.8(13.8,19.8) | 20.3(18.1,22.5) | 20.7(17.1,24.3) | 22.7(19.8,25.5) | 19.6(16.6,22.5) | 20.5(15.7,25.4) |
| >UL                      | 1.17(0.00,2.51)                               | 2.51(1.23,3.79) | 1.79(1.08,2.50) | 2.31(1.12,3.49) | 1.74(0.65,2.82) | 4.57(3.16,5.98) | 3.90(2.93,4.87) | 3.03(1.91,4.14) | 3.09(1.38,4.80) | 3.19(2.06,4.31) |
| <b>Mexican American</b>  |                                               |                 |                 |                 |                 |                 |                 |                 |                 |                 |
| <EAR                     | 60.7(57.7,63.7)                               | 52.9(48.6,57.2) | 50.2(44.3,56.0) | 51.7(47.6,55.8) | 51.8(48.8,54.9) | 49.2(44.1,54.3) | 40.6(37.4,43.8) | 46.3(42.0,50.5) | 49.0(45.9,52.0) | 44.5(40.8,48.2) |
| ≥EAR, <RDA               | 13.1(10.9,15.3)                               | 14.7(11.5,18.0) | 13.0(10.1,15.9) | 12.8(10.7,14.8) | 14.2(11.5,16.9) | 13.6(11.3,16.0) | 14.7(12.2,17.2) | 12.6(10.1,15.2) | 14.7(12.0,17.5) | 16.0(12.2,19.8) |
| ≥RDA, ≤UL                | 24.7(21.3,28.2)                               | 30.9(28.9,33.0) | 35.8(30.3,41.2) | 34.0(30.0,38.1) | 32.4(29.6,35.1) | 34.3(29.9,38.7) | 42.1(39.3,44.8) | 38.7(35.2,42.1) | 33.6(30.4,36.9) | 37.4(33.7,41.2) |
| >UL                      | 1.50(0.96,2.05)                               | 1.47(0.52,2.43) | 1.07(0.59,1.55) | 1.51(0.56,2.46) | 1.62(0.42,2.83) | 2.93(1.97,3.89) | 2.61(0.52,4.69) | 2.43(0.94,3.92) | 2.63(1.83,3.43) | 2.09(0.90,3.28) |
| <b>Other Hispanic</b>    |                                               |                 |                 |                 |                 |                 |                 |                 |                 |                 |
| <EAR                     | 63.8(58.2,69.3)                               | 56.8(50.9,62.8) | 66.9(59.7,74.1) | 55.0(43.1,66.9) | 50.0(45.8,54.2) | 47.8(43.4,52.2) | 51.5(47.1,56.0) | 51.2(45.5,56.9) | 52.7(47.9,57.6) | 50.9(44.6,57.1) |
| ≥EAR, <RDA               | 13.5(8.07,19.0)                               | 17.1(11.3,22.9) | 8.80(4.54,13.1) | 12.3(7.19,17.5) | 12.1(9.05,15.1) | 15.2(11.0,19.3) | 13.8(8.45,19.2) | 14.4(11.4,17.4) | 14.4(12.2,16.7) | 15.8(13.7,17.9) |
| ≥RDA, ≤UL                | 21.6(16.0,27.2)                               | 24.2(19.8,28.7) | 23.1(17.7,28.5) | 31.7(20.1,43.2) | 36.0(32.4,39.6) | 35.4(31.7,39.1) | 33.1(27.6,38.6) | 32.2(27.0,37.4) | 31.5(25.6,37.4) | 32.1(25.5,38.7) |
| >UL                      | 1.10(0.00,2.51)                               | 1.81(0.54,3.08) | 1.20(0.00,2.75) | 0.97(0.00,2.09) | 1.97(1.08,2.86) | 1.63(0.57,2.68) | 1.59(0.35,2.83) | 2.24(0.75,3.73) | 1.30(0.00,2.66) | 1.26(0.19,2.34) |

|                                             | Weighted Proportion of Population, % (95% CI) |                 |                 |                 |                 |                 |                 |                 |                 |                 |
|---------------------------------------------|-----------------------------------------------|-----------------|-----------------|-----------------|-----------------|-----------------|-----------------|-----------------|-----------------|-----------------|
|                                             | 1999-2000                                     | 2001-2002       | 2003-2004       | 2005-2006       | 2007-2008       | 2009-2010       | 2011-2012       | 2013-2014       | 2015-2016       | 2017-2018       |
| <b>Non-Hispanic White</b>                   |                                               |                 |                 |                 |                 |                 |                 |                 |                 |                 |
| <EAR                                        | 56.2(51.0,61.4)                               | 53.8(51.1,56.4) | 53.5(50.7,56.3) | 49.8(45.8,53.8) | 49.9(44.8,55.0) | 45.5(42.9,48.1) | 45.3(42.0,48.6) | 48.8(46.2,51.4) | 48.4(43.9,52.9) | 47.9(44.4,51.4) |
| ≥EAR, <RDA                                  | 12.1(10.4,13.7)                               | 12.0(10.6,13.5) | 13.2(11.8,14.6) | 14.0(11.7,16.2) | 15.2(13.3,17.1) | 13.6(11.8,15.3) | 14.4(11.8,17.0) | 13.3(11.6,15.0) | 14.2(12.0,16.3) | 16.0(13.6,18.4) |
| ≥RDA, ≤UL                                   | 30.3(26.3,34.2)                               | 31.4(29.1,33.7) | 30.5(27.9,33.2) | 33.3(30.6,36.1) | 32.2(28.6,35.8) | 36.6(34.4,38.9) | 37.0(34.0,40.1) | 34.5(31.3,37.7) | 34.5(30.8,38.2) | 33.0(29.9,36.1) |
| >UL                                         | 1.48(1.07,1.90)                               | 2.81(1.94,3.68) | 2.81(2.14,3.48) | 2.94(2.13,3.75) | 2.65(1.80,3.51) | 4.28(3.01,5.56) | 3.25(2.33,4.18) | 3.40(2.31,4.48) | 2.97(1.85,4.09) | 3.09(2.05,4.14) |
| <b>Non-Hispanic Black</b>                   |                                               |                 |                 |                 |                 |                 |                 |                 |                 |                 |
| <EAR                                        | 73.5(69.6,77.4)                               | 72.0(68.2,75.9) | 70.0(66.4,73.6) | 65.1(61.4,68.7) | 62.4(58.4,66.4) | 58.3(55.5,61.0) | 58.5(54.1,62.8) | 61.6(58.1,65.0) | 62.9(58.4,67.4) | 59.8(55.8,63.9) |
| ≥EAR, <RDA                                  | 10.3(7.95,12.6)                               | 9.67(6.66,12.7) | 11.0(9.36,12.6) | 10.5(8.48,12.5) | 13.7(11.8,15.6) | 13.3(11.1,15.5) | 12.3(10.6,13.9) | 10.4(9.05,11.8) | 13.4(10.8,16.0) | 12.6(10.1,15.1) |
| ≥RDA, ≤UL                                   | 15.8(13.2,18.3)                               | 18.0(13.7,22.3) | 18.4(16.3,20.4) | 23.7(20.7,26.7) | 22.8(19.2,26.4) | 26.8(22.9,30.7) | 27.7(23.8,31.6) | 26.5(23.8,29.1) | 22.6(18.9,26.4) | 25.8(22.8,28.9) |
| >UL                                         | 0.41(0.00,0.94)                               | 0.29(0.02,0.56) | 0.64(0.06,1.22) | 0.77(0.09,1.44) | 1.13(0.48,1.78) | 1.59(1.01,2.18) | 1.57(0.75,2.40) | 1.53(0.67,2.40) | 1.09(0.38,1.80) | 1.74(1.01,2.46) |
| <b>Other Race or Ethnicity <sup>a</sup></b> |                                               |                 |                 |                 |                 |                 |                 |                 |                 |                 |
| <EAR                                        | 74.7(67.2,82.2)                               | 69.2(61.5,76.9) | 66.7(58.0,75.4) | 59.7(53.2,66.2) | 63.5(56.3,70.7) | 54.5(48.2,60.7) | 57.5(53.6,61.3) | 57.7(51.1,64.4) | 57.5(50.6,64.4) | 54.2(49.6,58.9) |
| ≥EAR, <RDA                                  | 7.95(3.56,12.3)                               | 9.12(5.81,12.4) | 12.1(9.18,15.0) | 13.7(8.77,18.5) | 11.4(7.09,15.7) | 13.5(8.94,18.1) | 13.1(10.2,15.9) | 14.3(8.97,19.6) | 14.4(10.3,18.6) | 13.5(11.7,15.3) |
| ≥RDA, ≤UL                                   | 15.7(9.52,22.0)                               | 20.8(14.7,27.0) | 20.0(12.5,27.6) | 25.6(17.4,33.7) | 24.8(18.4,31.3) | 30.8(25.6,36.1) | 28.5(24.3,32.7) | 27.3(23.2,31.4) | 27.1(21.6,32.6) | 30.6(26.1,35.1) |
| >UL                                         | 1.63(0.00,3.60)                               | 0.84(0.00,2.15) | 1.15(0.00,2.51) | 1.07(0.00,2.47) | 0.26(0.00,0.80) | 1.21(0.02,2.41) | 0.98(0.29,1.67) | 0.68(0.07,1.29) | 0.97(0.28,1.66) | 1.66(0.40,2.92) |
| <b>Overall</b>                              |                                               |                 |                 |                 |                 |                 |                 |                 |                 |                 |
| <EAR                                        | 60.1(56.7,63.6)                               | 56.7(54.7,58.7) | 56.3(54.0,58.6) | 52.6(49.4,55.8) | 52.3(48.5,56.2) | 48.1(46.8,49.4) | 47.9(45.3,50.4) | 50.9(49.0,52.9) | 51.3(47.5,55.1) | 49.8(47.2,52.4) |
| ≥EAR, <RDA                                  | 11.8(10.3,13.4)                               | 12.1(10.8,13.5) | 12.7(11.7,13.8) | 13.4(12.0,14.7) | 14.5(13.3,15.8) | 13.6(12.6,14.7) | 14.0(12.3,15.8) | 13.0(11.8,14.3) | 14.2(13.0,15.4) | 15.3(13.7,17.0) |
| ≥RDA, ≤UL                                   | 26.7(24.3,29.1)                               | 28.9(26.9,31.0) | 28.7(26.5,31.0) | 31.7(29.3,34.1) | 30.9(28.0,33.8) | 34.8(33.4,36.1) | 35.4(33.3,37.6) | 33.3(31.4,35.2) | 32.1(28.9,35.3) | 32.3(30.2,34.4) |
| >UL                                         | 1.34(0.99,1.69)                               | 2.25(1.62,2.89) | 2.26(1.64,2.87) | 2.37(1.85,2.89) | 2.21(1.54,2.88) | 3.48(2.64,4.31) | 2.69(2.16,3.23) | 2.77(2.09,3.44) | 2.41(1.68,3.14) | 2.54(1.87,3.21) |

Abbreviations: CI, confidence interval; EAR, Estimated Average Requirement; RDA, Recommended Dietary Allowance; UL, Tolerable Upper Intake Level.

<sup>a</sup> Included multi-racial/ethnic groups.

**Table S1B** Prevalence of calcium-containing dietary supplement use among the US population with dietary calcium intake lower than their EARs, from 1999-2000 to 2017-2018

|                                             | Weighted Proportion of Population, % (95% CI) |                 |                 |                  |                 |                 |                  |                 |                 |                 |
|---------------------------------------------|-----------------------------------------------|-----------------|-----------------|------------------|-----------------|-----------------|------------------|-----------------|-----------------|-----------------|
|                                             | 1999-2000                                     | 2001-2002       | 2003-2004       | 2005-2006        | 2007-2008       | 2009-2010       | 2011-2012        | 2013-2014       | 2015-2016       | 2017-2018       |
| <b>Men</b>                                  |                                               |                 |                 |                  |                 |                 |                  |                 |                 |                 |
| no supplement                               | 69.3(64.5,74.1)                               | 67.0(63.7,70.2) | 64.1(60.2,68.0) | 63.9(59.1,68.7)  | 70.8(66.7,74.8) | 69.1(66.1,72.0) | 72.1(67.5,76.7)  | 68.9(65.4,72.4) | 72.0(68.8,75.2) | 73.4(68.7,78.0) |
| with supplement                             | 30.7(25.9,35.5)                               | 33.0(29.8,36.3) | 35.9(32.0,39.8) | 36.1(31.3,40.9)  | 29.2(25.2,33.3) | 30.9(28.0,33.9) | 27.9(23.32,32.5) | 31.1(27.6,34.6) | 28.0(24.8,31.2) | 26.6(22.0,31.3) |
| <b>Women</b>                                |                                               |                 |                 |                  |                 |                 |                  |                 |                 |                 |
| no supplement                               | 58.5(53.3,63.6)                               | 52.6(49.6,55.6) | 53.9(49.4,58.4) | 51.3(48.2,54.3)  | 59.0(56.7,61.2) | 59.7(55.1,64.4) | 62.2(59.7,64.8)  | 62.1(58.7,65.6) | 64.2(60.4,68.0) | 62.4(59.3,65.5) |
| with supplement                             | 41.5(36.4,46.7)                               | 47.4(44.4,50.4) | 46.1(41.6,50.6) | 48.7(45.7,51.8)  | 41.0(38.8,43.3) | 40.3(35.6,44.9) | 37.8(35.2,40.3)  | 37.9(34.4,41.3) | 35.8(32.0,39.6) | 37.6(34.5,40.7) |
| <b>2-8 years old</b>                        |                                               |                 |                 |                  |                 |                 |                  |                 |                 |                 |
| no supplement                               | 82.9(78.4,87.5)                               | 74.5(68.6,80.5) | 80.0(71.2,88.9) | 77.4(70.3,84.4)  | 76.4(66.9,85.9) | 85.1(80.8,89.4) | 85.7(78.5,92.8)  | 91.0(88.3,93.7) | 90.6(86.4,94.8) | 91.9(88.7,95.1) |
| with supplement                             | 17.1(12.5,21.6)                               | 25.5(19.5,31.4) | 20.0(11.1,28.8) | 22.6(15.6,29.7)  | 23.6(14.1,33.1) | 14.9(10.6,19.2) | 14.3(7.18,21.5)  | 9.00(6.28,11.7) | 9.38(5.20,13.6) | 8.09(4.92,11.3) |
| <b>9-18 years old</b>                       |                                               |                 |                 |                  |                 |                 |                  |                 |                 |                 |
| no supplement                               | 82.6(79.8,85.4)                               | 80.0(75.4,84.7) | 83.8(80.3,87.3) | 79.4(76.3,82.5)  | 82.4(77.5,87.3) | 84.9(80.5,89.4) | 86.2(82.8,89.6)  | 87.0(83.5,90.5) | 88.5(84.4,92.7) | 85.8(81.1,90.5) |
| with supplement                             | 17.4(14.6,20.2)                               | 20.0(15.3,24.6) | 16.2(12.7,19.7) | 20.6(17.5,23.7)  | 17.6(12.7,22.5) | 15.1(10.6,19.5) | 13.8(10.4,17.2)  | 13.0(9.46,16.5) | 11.5(7.30,15.6) | 14.2(9.54,18.9) |
| <b>19-59 years old</b>                      |                                               |                 |                 |                  |                 |                 |                  |                 |                 |                 |
| no supplement                               | 60.1(54.9,65.2)                               | 56.5(53.3,59.8) | 56.6(52.0,61.2) | 52.4(48.5,56.3)  | 64.2(60.9,67.6) | 62.3(56.4,68.2) | 66.4(62.5,70.2)  | 63.4(60.4,66.5) | 68.4(63.4,73.4) | 67.7(64.1,71.4) |
| with supplement                             | 39.9(34.8,45.1)                               | 43.5(40.2,46.7) | 43.4(38.8,48.0) | 47.6(43.7,51.5)  | 35.8(32.4,39.1) | 37.7(31.8,43.6) | 33.6(29.8,37.5)  | 36.6(33.5,39.6) | 31.6(26.6,36.6) | 32.3(28.6,35.9) |
| <b>60 years or older</b>                    |                                               |                 |                 |                  |                 |                 |                  |                 |                 |                 |
| no supplement                               | 45.8(39.9,51.7)                               | 40.3(36.0,44.5) | 38.2(33.7,42.7) | 41.2(37.1,45.4)  | 44.5(39.7,49.3) | 45.3(40.8,49.8) | 48.8(45.5,52.1)  | 46.6(42.8,50.3) | 46.6(41.8,51.3) | 47.6(42.1,53.0) |
| with supplement                             | 54.2(48.3,60.1)                               | 59.7(55.5,64.0) | 61.8(57.3,66.3) | 58.8(54.6,62.9)  | 55.5(50.7,60.3) | 54.7(50.2,59.2) | 51.2(47.9,54.5)  | 53.4(49.7,57.2) | 53.4(48.7,58.2) | 52.4(47.0,57.9) |
| <b>Mexican American</b>                     |                                               |                 |                 |                  |                 |                 |                  |                 |                 |                 |
| no supplement                               | 75.7(73.4,78.0)                               | 76.6(73.5,79.7) | 72.5(65.9,79.1) | 77.8(71.3,84.2)  | 82.9(76.9,88.9) | 76.7(72.8,80.7) | 80.1(74.8,85.5)  | 81.6(77.7,85.5) | 78.3(76.5,80.0) | 80.6(77.1,84.2) |
| with supplement                             | 24.3(22.0,26.6)                               | 23.4(20.3,26.5) | 27.5(20.9,34.1) | 22.2(15.80,28.7) | 17.1(11.1,23.1) | 23.3(19.3,27.2) | 19.9(14.5,25.2)  | 18.4(14.5,22.3) | 21.7(20.0,23.5) | 19.4(15.8,22.9) |
| <b>Other Hispanic</b>                       |                                               |                 |                 |                  |                 |                 |                  |                 |                 |                 |
| no supplement                               | 74.5(69.9,79.1)                               | 73.3(67.2,79.3) | 67.0(58.8,75.2) | 78.0(69.7,86.4)  | 77.9(71.9,83.9) | 79.3(74.2,84.4) | 72.8(62.5,83.0)  | 78.4(73.6,83.2) | 79.6(74.8,84.4) | 70.2(64.1,76.2) |
| with supplement                             | 25.5(20.9,30.1)                               | 26.7(20.7,32.8) | 33.0(24.8,41.2) | 22.0(13.6,30.3)  | 22.1(16.1,28.1) | 20.7(15.6,25.8) | 27.2(17.0,37.5)  | 21.6(16.8,26.4) | 20.4(15.6,25.2) | 29.8(23.8,35.9) |
| <b>Non-Hispanic White</b>                   |                                               |                 |                 |                  |                 |                 |                  |                 |                 |                 |
| no supplement                               | 56.3(51.1,61.5)                               | 49.8(46.6,52.9) | 50.5(46.4,54.6) | 47.6(44.5,50.8)  | 56.2(52.9,59.5) | 56.0(51.6,60.5) | 60.2(56.5,63.8)  | 56.6(54.9,58.3) | 60.9(57.0,64.9) | 61.3(56.6,66.0) |
| with supplement                             | 43.7(38.5,48.9)                               | 50.2(47.1,53.4) | 49.5(45.4,53.6) | 52.4(49.2,55.5)  | 43.8(40.5,47.1) | 44.0(39.5,48.4) | 39.8(36.2,43.5)  | 43.4(41.7,45.1) | 39.1(35.1,43.0) | 38.7(34.0,43.4) |
| <b>Non-Hispanic Black</b>                   |                                               |                 |                 |                  |                 |                 |                  |                 |                 |                 |
| no supplement                               | 79.0(75.6,82.3)                               | 77.0(73.1,81.0) | 81.0(77.9,84.1) | 75.1(70.7,79.6)  | 77.3(74.3,80.2) | 77.2(74.3,80.0) | 78.0(75.4,80.7)  | 79.8(74.5,85.2) | 79.4(75.1,83.6) | 76.8(72.2,81.4) |
| with supplement                             | 21.0(17.7,24.4)                               | 23.0(19.0,26.9) | 19.0(15.9,22.1) | 24.9(20.4,29.3)  | 22.7(19.8,25.7) | 22.8(20.0,25.7) | 22.0(19.3,24.6)  | 20.2(14.8,25.5) | 20.6(16.4,24.9) | 23.2(18.6,27.8) |
| <b>Other Race or Ethnicity <sup>a</sup></b> |                                               |                 |                 |                  |                 |                 |                  |                 |                 |                 |
| no supplement                               | 64.1(53.5,74.7)                               | 70.1(60.4,79.7) | 60.5(48.2,72.7) | 59.1(44.7,73.6)  | 68.2(56.7,79.6) | 68.2(59.4,76.9) | 68.2(61.5,74.8)  | 68.8(65.3,72.3) | 67.5(61.3,73.8) | 67.4(59.4,75.4) |
| with supplement                             | 35.9(25.3,46.5)                               | 29.9(20.3,39.6) | 39.5(27.3,51.8) | 40.9(26.4,55.3)  | 31.8(20.4,43.3) | 31.8(23.1,40.6) | 31.8(25.2,38.5)  | 31.2(27.7,34.7) | 32.5(26.2,38.7) | 32.6(24.6,40.6) |
| <b>Overall</b>                              |                                               |                 |                 |                  |                 |                 |                  |                 |                 |                 |
| no supplement                               | 63.0(59.1,66.9)                               | 58.4(55.7,61.1) | 58.1(54.3,61.9) | 56.3(53.5,59.1)  | 63.6(61.0,66.3) | 63.4(59.7,67.1) | 66.2(63.1,69.2)  | 64.9(62.4,67.4) | 67.3(64.3,70.4) | 66.7(64.3,69.1) |
| with supplement                             | 37.0(33.1,40.9)                               | 41.6(38.9,44.3) | 41.9(38.1,45.7) | 43.7(40.9,46.5)  | 36.4(33.7,39.0) | 36.6(32.9,40.3) | 33.8(30.8,36.9)  | 35.1(32.6,37.6) | 32.7(29.6,35.7) | 33.3(30.9,35.7) |

Abbreviations: CI, confidence interval; EAR, Estimated Average Requirement.

<sup>a</sup> Included multi-racial/ethnic groups.

**Table S2** Dietary and dietary supplement calcium intake distribution (weighted) across DRIs among the US population, from 2007-2008 to 2017-2018

|                                | Weighted Proportion of Population, % (95% CI) |                 |                 |                 |                 |                 |
|--------------------------------|-----------------------------------------------|-----------------|-----------------|-----------------|-----------------|-----------------|
|                                | 2007-2008                                     | 2009-2010       | 2011-2012       | 2013-2014       | 2015-2016       | 2017-2018       |
| <b>Men</b>                     |                                               |                 |                 |                 |                 |                 |
| <EAR                           | 39.2(35.7,42.7)                               | 34.6(33.3,36.0) | 34.2(31.2,37.3) | 37.4(34.7,40.2) | 37.9(34.4,41.4) | 37.7(35.2,40.1) |
| ≥EAR, <RDA                     | 13.6(12.5,14.7)                               | 12.6(11.3,14.0) | 13.8(11.6,16.1) | 12.8(11.0,14.7) | 13.9(12.3,15.6) | 14.0(12.2,15.8) |
| ≥RDA, ≤UL                      | 41.6(38.0,45.3)                               | 45.0(43.3,46.6) | 46.0(43.7,48.4) | 43.6(40.8,46.4) | 42.8(39.3,46.3) | 42.1(38.8,45.4) |
| >UL                            | 5.58(4.18,6.98)                               | 7.79(6.42,9.16) | 5.94(4.47,7.40) | 6.13(4.48,7.79) | 5.39(3.82,6.97) | 6.26(4.27,8.24) |
| <b>Women</b>                   |                                               |                 |                 |                 |                 |                 |
| <EAR                           | 47.9(43.1,52.8)                               | 44.6(42.4,46.7) | 46.5(43.1,49.8) | 48.6(46.4,50.7) | 50.6(45.8,55.5) | 50.1(47.0,53.3) |
| ≥EAR, <RDA                     | 12.2(10.3,14.0)                               | 12.9(11.3,14.6) | 13.7(12.1,15.2) | 13.2(11.9,14.5) | 14.7(12.0,17.3) | 14.4(12.3,16.5) |
| ≥RDA, ≤UL                      | 34.2(30.8,37.5)                               | 36.3(34.2,38.3) | 34.9(32.0,37.7) | 33.0(30.4,35.6) | 30.7(26.0,35.3) | 31.4(28.1,34.8) |
| >UL                            | 5.77(3.93,7.61)                               | 6.23(5.40,7.07) | 4.97(3.76,6.19) | 5.23(3.88,6.59) | 4.02(2.88,5.15) | 4.03(3.05,5.02) |
| <b>2-8 years old</b>           |                                               |                 |                 |                 |                 |                 |
| <EAR                           | 34.7(31.6,37.7)                               | 28.9(26.4,31.4) | 26.9(22.7,31.2) | 33.8(30.5,37.2) | 35.6(31.2,40.1) | 33.2(29.0,37.5) |
| ≥EAR, <RDA                     | 18.0(14.6,21.4)                               | 17.7(14.9,20.5) | 18.7(15.9,21.4) | 14.5(11.8,17.2) | 18.9(15.7,22.0) | 18.1(14.5,21.7) |
| ≥RDA, ≤UL                      | 46.9(43.6,50.3)                               | 52.3(48.7,55.9) | 53.1(49.0,57.2) | 50.3(45.4,55.1) | 44.7(41.2,48.3) | 48.2(43.6,52.8) |
| >UL                            | 0.42(0.04,0.80)                               | 1.10(0.46,1.74) | 1.27(0.35,2.19) | 1.41(0.32,2.49) | 0.80(0.00,1.60) | 0.49(0.01,0.98) |
| <b>9-18 years old</b>          |                                               |                 |                 |                 |                 |                 |
| <EAR                           | 62.6(57.9,67.3)                               | 58.3(53.8,62.8) | 56.2(51.5,60.8) | 61.0(56.7,65.4) | 63.9(58.5,69.3) | 64.0(58.3,69.8) |
| ≥EAR, <RDA                     | 12.2(9.85,14.5)                               | 9.54(7.43,11.7) | 11.5(8.25,14.7) | 11.0(8.11,13.9) | 10.6(7.59,13.7) | 11.3(8.38,14.2) |
| ≥RDA, ≤UL                      | 24.0(20.7,27.2)                               | 30.4(26.7,34.2) | 31.7(27.0,36.4) | 26.6(23.2,30.1) | 24.2(19.7,28.6) | 24.1(20.1,28.1) |
| >UL                            | 1.22(0.68,1.76)                               | 1.73(1.22,2.24) | 0.65(0.00,1.31) | 1.37(0.09,2.65) | 1.27(0.41,2.13) | 0.59(0.07,1.10) |
| <b>19-59 years old</b>         |                                               |                 |                 |                 |                 |                 |
| <EAR                           | 40.2(35.8,44.5)                               | 35.7(33.7,37.7) | 37.9(34.3,41.6) | 39.4(36.8,42.0) | 40.1(35.6,44.6) | 39.3(36.4,42.1) |
| ≥EAR, <RDA                     | 12.4(11.1,13.6)                               | 13.5(11.9,15.1) | 13.7(11.8,15.7) | 14.0(12.6,15.5) | 14.7(13.1,16.2) | 14.7(12.9,16.4) |
| ≥RDA, ≤UL                      | 41.3(36.8,45.8)                               | 43.7(41.5,45.8) | 43.4(40.9,45.9) | 41.1(38.2,44.1) | 40.5(36.3,44.8) | 40.7(37.9,43.5) |
| >UL                            | 6.23(4.52,7.94)                               | 7.21(5.97,8.46) | 5.01(3.52,6.50) | 5.42(4.06,6.78) | 4.69(3.23,6.15) | 5.35(3.86,6.85) |
| <b>60 years or older</b>       |                                               |                 |                 |                 |                 |                 |
| <EAR                           | 45.6(40.0,51.2)                               | 43.8(41.7,46.0) | 44.0(40.0,47.9) | 45.4(43.1,47.7) | 47.1(42.9,51.2) | 48.2(42.4,53.9) |
| ≥EAR, <RDA                     | 12.1(9.30,15.0)                               | 10.6(9.49,11.6) | 12.9(10.5,15.2) | 10.9(8.96,12.8) | 13.7(9.85,17.6) | 13.2(10.8,15.7) |
| ≥RDA, ≤UL                      | 31.9(27.9,35.9)                               | 32.2(29.7,34.7) | 31.0(27.6,34.3) | 32.5(28.7,36.2) | 30.6(25.8,35.4) | 29.4(23.4,35.5) |
| >UL                            | 10.4(7.36,13.4)                               | 13.4(11.6,15.2) | 12.2(9.19,15.2) | 11.3(9.13,13.5) | 8.55(6.41,10.7) | 9.17(7.36,11.0) |
| <b>Mexican American</b>        |                                               |                 |                 |                 |                 |                 |
| <EAR                           | 48.1(45.0,51.2)                               | 44.8(39.8,49.9) | 36.9(34.2,39.5) | 42.9(37.8,48.0) | 45.3(42.3,48.3) | 41.8(37.9,45.8) |
| ≥EAR, <RDA                     | 14.6(12.3,16.9)                               | 13.9(11.4,16.5) | 15.2(12.6,17.9) | 13.0(9.76,16.2) | 15.3(12.7,17.9) | 15.2(11.3,19.1) |
| ≥RDA, ≤UL                      | 34.8(31.8,37.7)                               | 37.2(33.0,41.4) | 44.7(41.7,47.7) | 40.7(37.4,44.0) | 36.2(32.9,39.5) | 39.6(36.4,42.7) |
| >UL                            | 2.56(1.25,3.88)                               | 4.02(2.79,5.25) | 3.24(1.14,5.33) | 3.43(1.77,5.09) | 3.19(2.30,4.09) | 3.38(1.85,4.91) |
| <b>Other Hispanic</b>          |                                               |                 |                 |                 |                 |                 |
| <EAR                           | 46.1(42.3,49.8)                               | 43.9(39.6,48.2) | 46.3(41.5,51.0) | 47.2(41.4,52.9) | 49.3(44.8,53.8) | 46.3(39.4,53.2) |
| ≥EAR, <RDA                     | 11.9(8.55,15.2)                               | 13.5(9.30,17.7) | 14.5(10.3,18.7) | 14.8(11.4,18.2) | 15.0(12.3,17.6) | 16.3(13.6,19.0) |
| ≥RDA, ≤UL                      | 38.9(35.7,42.0)                               | 38.8(36.0,41.7) | 35.8(31.8,39.7) | 35.3(30.3,40.2) | 33.4(27.7,39.0) | 35.4(28.2,42.6) |
| >UL                            | 3.18(1.62,4.75)                               | 3.74(2.34,5.14) | 3.46(1.81,5.11) | 2.80(1.27,4.33) | 2.39(0.22,4.55) | 1.98(0.53,3.43) |
| <b>Non-Hispanic White</b>      |                                               |                 |                 |                 |                 |                 |
| <EAR                           | 39.5(34.3,44.8)                               | 35.3(33.4,37.1) | 36.7(33.5,39.9) | 39.2(36.3,42.1) | 40.2(36.1,44.4) | 40.9(38.0,43.8) |
| ≥EAR, <RDA                     | 12.7(11.3,14.0)                               | 12.4(10.4,14.4) | 13.6(11.3,15.8) | 13.1(11.7,14.4) | 14.4(12.3,16.6) | 14.3(12.6,16.0) |
| ≥RDA, ≤UL                      | 40.8(36.4,45.1)                               | 43.5(41.1,45.9) | 42.8(40.0,45.7) | 40.4(37.0,43.8) | 39.1(34.8,43.5) | 38.3(35.4,41.2) |
| >UL                            | 7.04(5.06,9.02)                               | 8.85(7.52,10.2) | 6.90(5.50,8.29) | 7.35(5.66,9.04) | 6.20(4.60,7.81) | 6.47(5.07,7.87) |
| <b>Non-Hispanic Black</b>      |                                               |                 |                 |                 |                 |                 |
| <EAR                           | 58.5(55.2,61.8)                               | 53.6(50.3,56.9) | 53.1(48.2,58.0) | 56.0(52.8,59.3) | 59.4(54.7,64.2) | 56.2(52.4,60.1) |
| ≥EAR, <RDA                     | 12.8(10.9,14.8)                               | 13.5(12.1,14.9) | 12.9(11.1,14.8) | 11.2(9.58,12.8) | 12.8(10.0,15.6) | 12.6(10.4,14.8) |
| ≥RDA, ≤UL                      | 26.1(23.0,29.2)                               | 30.3(26.6,34.0) | 31.2(27.1,35.2) | 30.8(28.3,33.3) | 26.3(22.8,29.8) | 28.2(25.9,30.4) |
| >UL                            | 2.53(1.63,3.43)                               | 2.61(1.62,3.60) | 2.80(1.47,4.12) | 1.96(1.12,2.79) | 1.48(0.68,2.27) | 2.97(1.59,4.36) |
| <b>Other Race or Ethnicity</b> |                                               |                 |                 |                 |                 |                 |
| <EAR                           | 53.2(43.8,62.7)                               | 47.9(40.7,55.0) | 49.6(46.2,53.0) | 51.0(45.0,57.0) | 48.5(41.7,55.4) | 49.0(45.5,52.5) |
| ≥EAR, <RDA                     | 13.1(8.78,17.5)                               | 13.0(9.21,16.8) | 14.1(10.7,17.5) | 13.9(9.31,18.5) | 13.9(11.6,16.2) | 13.1(11.1,15.1) |
| ≥RDA, ≤UL                      | 30.0(21.4,38.6)                               | 35.5(29.4,41.6) | 33.9(30.2,37.6) | 31.7(27.5,35.9) | 35.4(29.5,41.3) | 34.1(30.5,37.8) |
| >UL                            | 3.66(0.15,7.16)                               | 3.63(0.92,6.35) | 2.42(0.90,3.94) | 3.42(1.55,5.29) | 2.18(1.04,3.32) | 3.78(0.89,6.67) |
| <b>Overall</b>                 |                                               |                 |                 |                 |                 |                 |
| <EAR                           | 43.7(39.8,47.7)                               | 39.7(38.4,41.0) | 40.4(37.7,43.1) | 43.1(41.1,45.0) | 44.4(40.5,48.4) | 44.1(41.6,46.5) |
| ≥EAR, <RDA                     | 12.9(11.9,13.8)                               | 12.8(11.5,14.1) | 13.8(12.2,15.3) | 13.0(11.8,14.2) | 14.3(13.0,15.7) | 14.2(12.9,15.5) |
| ≥RDA, ≤UL                      | 37.7(34.5,41.0)                               | 40.5(38.8,42.2) | 40.4(38.3,42.5) | 38.2(36.0,40.4) | 36.6(33.0,40.2) | 36.6(34.6,38.6) |
| >UL                            | 5.68(4.27,7.09)                               | 6.99(6.10,7.88) | 5.45(4.43,6.47) | 5.68(4.53,6.82) | 4.69(3.51,5.87) | 5.12(4.22,6.01) |

Abbreviation: CI, confidence interval; EAR, Estimated Average Requirement; RDA, Recommended Dietary Allowance; UL, Tolerable Upper Intake Level.
